# Supplementary material for: Asa Issie, Aramis and the origin of Australopithecus
Source: Springer Nature journal article supplement (doi:10.1038/nature04629), 2006-04-01
Supplement: 41586_2006_BFnature04629_MOESM7_ESM.pdf [file 41586_2006_BFnature04629_MOESM7_ESM.pdf]

Supplementary Table 1. Hominid fossils

| Specimen Number | Element                                                                       | Date     | Discoverer              | Dental Metrics                                                                                                       |
|-----------------|-------------------------------------------------------------------------------|----------|-------------------------|----------------------------------------------------------------------------------------------------------------------|
| ARA-VP-14       | 1 R. and L. Maxilla with teeth                                                | 11/13/94 | Alemayehu Asfaw         | LUI2 BL (7.0); RUM1 MD 10.5(11.1), BL 12.7; RUM2 MD 11.0(11.8), BL 13.9; RUM3 MD (12.6); LUM3 MD 12.5(12.7), BL 14.1 |
| ASI-VP-         | 2 1 Second metatarsal shaft                                                   | 12/15/00 | Group (KK)              |                                                                                                                      |
| ASI-VP-         | 2 2 Upper dentition                                                           | 12/15/00 | Group (AS)              |                                                                                                                      |
|                 | A L. UI1 mesial fragment                                                      |          |                         |                                                                                                                      |
|                 | B R. UI1                                                                      |          |                         | BL (8.7)                                                                                                             |
|                 | C R. UC                                                                       |          |                         | MD 11.2(11.5), BL 10.9, MxOB 11.8, MxPP 10.1                                                                         |
|                 | E R. UM1 buccal half                                                          |          |                         | MD 11.7(12.0)                                                                                                        |
|                 | F L. UM2                                                                      |          |                         | MD 12.6(12.8), BL 14.9                                                                                               |
|                 | D L. UC                                                                       |          |                         | MxOB 11.7                                                                                                            |
| ASI-VP-         | 2 3 L. LC root                                                                | 12/17/00 | Group                   | MxOB(10.3)                                                                                                           |
| ASI-VP-         | 2 5 L. LM1 fragment (Distal crown third)                                      | 12/17/00 | Berhane Asfaw           |                                                                                                                      |
| ASI-VP-         | 2 6 Intermediate hand phalanx                                                 | 12/18/00 | Group (AS)              |                                                                                                                      |
| ASI-VP-         | 2 7 R. LM fragment (mesial quadrant)                                          | 12/18/00 | Leslea Hlusko           |                                                                                                                      |
| ASI-VP-         | 2 214 AXI fragment                                                            | 12/00    | Group                   |                                                                                                                      |
| ASI-VP-         | 2 215 Proximal foot phalanx (Distal quadrant, split)                          | 12/15/00 | Group                   |                                                                                                                      |
| ASI-VP-         | 2 216 L.UI1 fragment (sliver of distal lingual base)                          | 12/15/00 | Group                   |                                                                                                                      |
| ASI-VP-         | 2 220 VER fragment (cervical; atlas)                                          | 12/00    | Group                   |                                                                                                                      |
| ASI-VP-         | 2 223 R. VER fragment (thoracic)                                              | 12/00    | Group                   |                                                                                                                      |
| ASI-VP-         | 2 224 VER fragment (lower cervical or upper thoracic)                         | Dec-00   | Group                   |                                                                                                                      |
| ASI-VP-         | 2 277 Cranial fragment                                                        | 12/08/02 | Group                   |                                                                                                                      |
| ASI-VP-         | 2 334 R. + L. U C's, R. UP4-M1                                                | 12/08/02 | Kampiro Kairento        |                                                                                                                      |
|                 | A R. UC                                                                       |          |                         | MD 12.3, BL 11.8, MxOB 12.4, MxPP 10.8                                                                               |
|                 | B L. UC mesiobuccal fragment                                                  |          |                         | MD 9.9, mxMD(buccal) 9.5, BL 14.1, MxBL 14.2                                                                         |
|                 | C R. UP3                                                                      |          |                         | MD 10.2, BL 14.3                                                                                                     |
|                 | D R. UP4                                                                      |          |                         | MD 12.0(12.1), BL 14.1(14.2)                                                                                         |
|                 | E R. UM1                                                                      |          |                         | MD 14.1(14.3), BL 16.7                                                                                               |
|                 | F R. UM2                                                                      |          |                         | MD 13.5(13.6), BL 16.1                                                                                               |
|                 | G R. UM3                                                                      |          |                         |                                                                                                                      |
| ASI-VP-         | 2 335 R. UM3                                                                  | 12/08/02 | Wagano Amerga           |                                                                                                                      |
| ASI-VP-         | 2 336 L. UP4 (distobuccal fragment)                                           | 01/03/04 | Alemayehu Asfaw         |                                                                                                                      |
| ASI-VP-         | 2 367 R. UC                                                                   | 12/10/05 | Ferhat Kaya             | MD 10.2 (10.0), BL 9.3 (9.1), MxOB 10.5 (10.3), MxPP 8.8 (8.6)                                                       |
| ASI-VP-         | 5 1 R. LM3                                                                    | 12/23/02 | Yohannes Haile-Selassie | MD 15.4(15.6), BL 13.8                                                                                               |
| ASI-VP-         | 5 146 L. LM2 or 3 (mesiobuccal fragment)                                      | 12/24/02 | Giday WoldeGabriel      |                                                                                                                      |
| ASI-VP-         | 5 147 R. LM2 or 3 (mesiobuccal fragment with anterior fovea, pd and part. hd) | 12/26/02 | Cesur Pehlevan          |                                                                                                                      |
| ASI-VP-         | 5 148 LUM (mesiolingual fragment)                                             | 12/26/02 | Cesur Pehlevan          |                                                                                                                      |
| ASI-VP-         | 5 151 L. LM2 (or 1) fragment                                                  | 12/26/02 | Kampiro Kairento        |                                                                                                                      |
| ASI-VP-         | 5 152 Cranial fragment (? Parietal)                                           | 12/24/02 | Cesur Pehlevan          |                                                                                                                      |
| ASI-VP-         | 5 154 R. Femur shaft                                                          | 12/26/02 | Tim White               |                                                                                                                      |
| ASI-VP-         | 5 160 R. UI2                                                                  | 01/03/04 | Yohannes Haile-Selassie | MD (5.8), BL 6.0                                                                                                     |
| ASI-VP-         | 5 166 L. Udm1 (distal half, with metacone, hypocone, portion of protocone)    | 01/03/04 | Group                   |                                                                                                                      |
| ASI-VP-         | 5 182 L. UM2 or 3 (distal half)                                               | 12/20/05 | Kampiro Kairento        |                                                                                                                      |
| ASI-VP-         | 5 186 L. LM3                                                                  | 12/20/05 | Kampiro Kairento        | MD (14.2), BL 13.4                                                                                                   |
| ASI-VP-         | 5 188 M or P fragment                                                         | 12/23/05 | Endris Mekonnen         |                                                                                                                      |
| ASI-VP-         | 5 189 Edentulous anterior mandibular fragment (bicanine)                      | 12/23/05 | Endris Mekonnen         |                                                                                                                      |
| HAN-VP-         | 1 12 U. tooth fragments                                                       | 12/12/02 | Kamoya Kimeu            |                                                                                                                      |
|                 | A R. UI1 (distolabial fragment)                                               |          |                         |                                                                                                                      |
|                 | B L. UM2 (hypocone fragment)                                                  |          |                         |                                                                                                                      |
|                 | C L. UM (mesiolingual fragment)                                               |          |                         |                                                                                                                      |
