# Supplementary material for: Asa Issie, Aramis and the origin of Australopithecus
Source: Springer Nature journal article supplement (doi:10.1038/nature04629), 2006-04-01
Supplement: 41586_2006_BFnature04629_MOESM8_ESM.pdf [file 41586_2006_BFnature04629_MOESM8_ESM.pdf]

| Supplementary Table 2. Isotopic composition of ASI paleosol carbonates. |                    |       |                   |           |                          |               |               |               |             |
|-------------------------------------------------------------------------|--------------------|-------|-------------------|-----------|--------------------------|---------------|---------------|---------------|-------------|
| SIMA02 #                                                                | Site               | Level | Material          | Carb MAW# | Material                 | Carb 13C      | 18Opdb        | 18Osmow       | %C4         |
| 19                                                                      | Asa Issie Upper tr | 3     | Silty clay        | 260       | Root cast 10.5x5 cm      | -6.039        | -5.927        | 24.800        | 35.4        |
| 20a                                                                     | Asa Issie Upper tr | 3     | Silty clay        | 261       | Root cast 1.5x2 cm       | -6.147        | -5.334        | 25.411        | 34.7        |
| 20b                                                                     | Asa Issie Upper tr | 3     | Silty clay        | 262       | Root cast 4x1.4 w xtals  | -6.895        | -6.532        | 24.176        | 29.3        |
| 21                                                                      | Asa Issie Upper tr | 5     | Clayey silt crumb | 263       | Nodule 5.5x3.5 cm        | -7.635        | -5.806        | 24.924        | 24.0        |
| 22                                                                      | Asa Issie Upper tr | 5     | Clayey silt crumb | 264       | Nodule 5.5x3.5 cm        | -7.092        | -6.397        | 24.315        | 27.9        |
| 23                                                                      | Asa Issie Upper tr | 5     | Clayey silt crumb | 265       | Nodule 9.5x5.5 cm        | -7.032        | -7.837        | 22.780        | 28.3        |
| 24                                                                      | Asa Issie Upper tr | 5     | Clayey silt crumb | 266       | Root cast 5x2 cm         | -7.092        | -6.532        | 24.176        | 27.9        |
| 25                                                                      | Asa Issie Upper tr | 7     | Silt              | 267       | Nodule 8x3 cm            | -7.047        | -6.048        | 24.675        | 28.2        |
| 26                                                                      | Asa Issie Upper tr | 7     | Silt              | 268       | Nodule w. xtals 6x3.5 cm | -7.503        | -9.027        | 21.604        | 25.0        |
| 27                                                                      | Asa Issie Upper tr | 8     | Siltstone         | 269       | Nodule crumbly 7x4 cm    | -7.310        | -6.840        | 23.859        | 26.4        |
| 28                                                                      | Asa Issie Lower tr | 5     | Clayey silt crumb | 270       | Root cast 4x2 cm         | -6.307        | -5.134        | 25.617        | 33.5        |
| 29                                                                      | Asa Issie Lower tr | 5     | Clayey silt crumb | 271       | Root cast 2.5x1 cm       | -5.788        | -4.659        | 26.200        | 37.2        |
| 30a                                                                     | Asa Issie Lower tr | 5     | Clayey silt crumb | 272       | Root cast 1.5x2.5 cm     | -6.546        | -5.534        | 25.205        | 31.8        |
| 30b                                                                     | Asa Issie Lower tr | 5     | Clayey silt crumb | 273       | Root cast 1.5x2.5 cm     | -6.360        | -4.683        | 26.082        | 33.1        |
| 31a                                                                     | Asa Issie Lower tr | 5     | Clayey silt crumb | 274       | Root cast 3x2 cm         | -6.551        | -4.971        | 25.785        | 31.8        |
| 31b                                                                     | Asa Issie Lower tr | 5     | Clayey silt crumb | 275       | Root cast 3x2 cm         | -6.602        | -4.920        | 25.838        | 31.4        |
| 32a                                                                     | Asa Issie Lower tr | 5     | Clayey silt crumb | 276       | Root cast 3.5x2 cm       | -6.653        | -4.585        | 26.183        | 31.1        |
| 32b                                                                     | Asa Issie Lower tr | 5     | Clayey silt crumb | 277       | Root cast 3.5x2 cm       | -6.531        | -3.395        | 27.410        | 31.9        |
| 33                                                                      | Asa Issie Lower tr | 5     | Clayey silt crumb | 278       | Root cast 6x2.5 cm       | -6.204        | -4.324        | 26.452        | 34.3        |
| 34                                                                      | Asa Issie North tr | 4     | Silt/claystone    | 279       | Nodule w. xtals 1.5x2 cm | -7.456        | -7.857        | 22.801        | 25.3        |
|                                                                         |                    |       |                   |           | <i>Mean upper</i>        | <b>-6.921</b> | <b>-6.361</b> | <b>24.346</b> | <b>29.1</b> |
|                                                                         |                    |       |                   |           | <i>Mean lower</i>        | <b>-6.394</b> | <b>-4.689</b> | <b>26.086</b> | <b>32.9</b> |
|                                                                         |                    |       |                   |           | <i>SD upper</i>          | <b>0.515</b>  | <b>0.717</b>  | <b>0.753</b>  |             |
|                                                                         |                    |       |                   |           | <i>SD lower</i>          | <b>0.271</b>  | <b>0.598</b>  | <b>0.618</b>  |             |

Interiors of carbonate nodules and rootcasts were drilled with a diamond burr rotary tool. Powdered samples weighing 30-130 mg were roasted under vacuum at 400°C for 4 hours. Samples weighing 45-220 µg were reacted at 70°C under vacuum with 100% phosphoric acid and CO<sub>2</sub> was cryogenically distilled in a Kiel 3 device interfaced with a Finnegan MAT252 isotope ratio mass spectrometer. Precision of analysis is ± 0.06‰ for d<sup>13</sup>C and ± 0.10‰ for d<sup>18</sup>O. Estimates of %C<sub>4</sub> biomass are predicated on the assumption that the end member d<sup>13</sup>C values for pure C<sub>3</sub> and C<sub>4</sub> environments are approximately -26.5 and -12.5‰, respectively, and carbonate d<sup>13</sup>C values are enriched by an average of 15.5‰ relative to those of the flora (Cerling 1984). Therefore the end member d<sup>13</sup>C values for carbonates formed in pure C<sub>3</sub> and C<sub>4</sub> environments are approximately -11.0 and +3.0‰, respectively. Recrystallized specimens are diagenetically altered, and have not been used for calculation of means and standard deviations.
