# Supplementary material for: Asa Issie, Aramis and the origin of Australopithecus
Source: Springer Nature journal article supplement (doi:10.1038/nature04629), 2006-04-01
Supplement: 41586_2006_BFnature04629_MOESM9_ESM.pdf [file 41586_2006_BFnature04629_MOESM9_ESM.pdf]

**Supplementary Table 3. Faunal list for Asa Issie (ASI) localities VP-2 and VP-5.**

MAMMALIA

Primates (172 + 49)

Hominidae (8 + 5)

*Australopithecus anamensis* (8 + 5)

Cercopithecidae (158 + 41)

Cercopithecinae (5 + 4)

*Parapapio* sp. (1 + 3)

Colobinae (46 + 11)

*Kuseracolobus hafu* (20 + 0)

Carnivora (11 + 32)

Hyaenidae (1 + 10)

*Hyaenicttherium* cf. *namaquensis*. (0 + 3)

Felidae (1 + 10)

cf. *Machairodus* sp. (0 + 2)

aff. *Dinofelis* sp. (0 + 1)

*Felis* sp. (0 + 3)

cf. Mustelidae (Lutrinae) (4 + 3)

Viverridae (1 + 5)

Herpestidae (2 + 0)

*Helogale* sp. (1 + 0)

Tubulidentata (4 + 1)

*Orycteropus* cf. *djourabensis* (4 + 1)

Proboscidea (0 + 0\*)

*Anancus* sp. (adv)

*Deinotherium* sp.

*Elephas* sp.

Perissodactyla

Rhinocerotidae (0 + 4)

Equidae (1 + 1)

*Eurygnathohippus* sp. (1 + 1)

Artiodactyla

Suidae (9 + 13)

*Nyanzachoerus kanamensis* (0 + 0\*)

*Nyanzachoerus jaegeri* (adv) (2 + 0\*)

*Kolpochoerus deheinzeli* (3 + 2)

Hippopotamidae (6 + 0)

aff. *Hippopotamus* sp.

Giraffidae (0\* + 3)

Bovidae (79 + 34)

Aepycerotini (10 + 5)

*Aepyceros* (10 + 5)

Hippotragini (1 + 0)

Neotragini (2 + 0)

Tragelaphini (49 + 15)

*Tragelaphus kyaloe*

Chiroptera (1 + 0)

Emballonuridae (1 + 0)

*Taphozous* sp. (1 + 0)

Insectivora (3 + 0)

Soricidae (3 + 0)

*Crocidura aithiops* (3 + 0)

Lagomorpha (1 + 2)

Leporidae (0 + 1)

Rodentia (36 + 3)

Hystricidae (4 + 1)

*Atherurus* sp. (3 + 1)

*Xenohystrix* sp. (1)

Muridae (30 + 2)

*Golunda gurai* (2 + 0)

*Lemniscomys* aff. *striatus* (4 + 0)

*Praomys* sp. (6 + 0)

*Oenomys* sp. (1 + 0)

*Uranomys* sp. (lg.) (17 + 2)

AVES

Accipitridae

*Buteo* cf. *rufinus* (2 + 0)

Phasianidae

cf. *Francolinus* sp. indet. A (3 + 0)

Phasianidae sp. indet. B (1 + 0)

Psittacidae

cf. *Agapornis* sp. indet. (0 + 1)

Columbidae (1 + 0)

---

Total sample from strata <3 m thickness. A <10,000 m<sup>2</sup> area was subjected to 100% surface collection. A total of 540 specimens from these localities were assignable to the taxa on this list, 366 from VP-2 and 174 from VP-5 (totals do not include a small 2005 collection supplement of 2 additional hominids, 5 bovid teeth and 3 small mammals). All teeth with >1/2 crown preserved are included in these figures; more fragmentary teeth were included in the "bulk" category and not counted here or in Figure 1. The first number in parenthesis represents the NISP value for VP-2, the second for VP-5. An asterisk (\*) denotes that a taxon's presence was identified only by small tooth fragments, always < 1/2 crown and collected as "bulk" lots.
