# Supplementary material for: Asa Issie, Aramis and the origin of Australopithecus
Source: Springer Nature journal article supplement (doi:10.1038/nature04629), 2006-04-01
Supplement: 41586_2006_BFnature04629_MOESM10_ESM.pdf [file 41586_2006_BFnature04629_MOESM10_ESM.pdf]

**Supplementary Table 4. Radioisotopic dating results.**

| Run ID    | Power (W) | <sup>40</sup> Ar (moles) | <sup>40</sup> Ar (nA) | ± σ (nA) | <sup>39</sup> Ar (nA) | ± σ (nA) | <sup>38</sup> Ar (nA) | ± σ (nA) | <sup>37</sup> Ar (nA) | ± σ (nA) | <sup>36</sup> Ar (nA) | ± σ (nA) | <sup>40</sup> Ar*/ <sup>39</sup> Ar <sub>K</sub> | ± σ    | % <sup>40</sup> Ar* | Age (Ma) | ± σ (Ma) |
|-----------|-----------|--------------------------|-----------------------|----------|-----------------------|----------|-----------------------|----------|-----------------------|----------|-----------------------|----------|--------------------------------------------------|--------|---------------------|----------|----------|
| 33764-01D | 3         | 1.92E-14                 | 3.13741               | 0.00491  | 0.00955               | 0.00017  | 0.00199               | 0.00004  | 0.03426               | 0.00024  | 0.01076               | 0.00010  | -4.7878                                          | 4.2913 | -1.45               | -11.438  | 10.284   |
| 33764-01E | 4         | 1.67E-14                 | 2.72943               | 0.00431  | 0.03053               | 0.00025  | 0.00213               | 0.00005  | 0.09336               | 0.00084  | 0.00877               | 0.00009  | 4.5916                                           | 1.2014 | 5.12                | 10.901   | 2.844    |
| 33764-01F | 5         | 6.01E-15                 | 0.98311               | 0.00192  | 0.04986               | 0.00030  | 0.00124               | 0.00003  | 0.16123               | 0.00148  | 0.00292               | 0.00006  | 2.6133                                           | 0.4111 | 13.22               | 6.213    | 0.976    |
| 33764-01G | 6         | 3.81E-15                 | 0.62293               | 0.00162  | 0.11428               | 0.00047  | 0.00182               | 0.00004  | 0.36753               | 0.00359  | 0.00141               | 0.00005  | 2.0504                                           | 0.1335 | 37.53               | 4.876    | 0.317    |
| 33764-01H | 7         | 3.85E-15                 | 0.62959               | 0.00091  | 0.18128               | 0.00061  | 0.00247               | 0.00005  | 0.53120               | 0.01098  | 0.00127               | 0.00005  | 1.6341                                           | 0.0784 | 46.95               | 3.887    | 0.186    |
| 33764-01I | 8         | 3.20E-15                 | 0.52386               | 0.00142  | 0.14503               | 0.00030  | 0.00229               | 0.00005  | 0.47040               | 0.00659  | 0.00103               | 0.00003  | 1.7741                                           | 0.0706 | 49.01               | 4.220    | 0.168    |
| 33764-01J | 9         | 3.85E-15                 | 0.63008               | 0.00172  | 0.14058               | 0.00035  | 0.00217               | 0.00004  | 0.47718               | 0.00640  | 0.00149               | 0.00005  | 1.6031                                           | 0.1089 | 35.68               | 3.814    | 0.259    |
| 33764-01K | 10        | 1.16E-15                 | 0.19026               | 0.00087  | 0.05166               | 0.00018  | 0.00082               | 0.00003  | 0.18357               | 0.00144  | 0.00037               | 0.00003  | 1.8271                                           | 0.1733 | 49.48               | 4.346    | 0.412    |
| 33764-01L | 11        | 1.27E-15                 | 0.21002               | 0.00071  | 0.05318               | 0.00022  | 0.00079               | 0.00003  | 0.20326               | 0.00146  | 0.00047               | 0.00003  | 1.6202                                           | 0.1713 | 40.91               | 3.854    | 0.407    |
| 33764-02A | 2         | 5.29E-15                 | 0.84959               | 0.00203  | 0.00905               | 0.00011  | 0.00070               | 0.00003  | 0.04019               | 0.00046  | 0.00285               | 0.00006  | 0.9580                                           | 2.0278 | 1.02                | 2.280    | 4.823    |
| 33764-02B | 3         | 6.71E-15                 | 1.06916               | 0.00253  | 0.02335               | 0.00012  | 0.00091               | 0.00003  | 0.09477               | 0.00078  | 0.00326               | 0.00006  | 4.7857                                           | 0.8853 | 10.42               | 11.361   | 2.095    |
| 33764-02C | 4         | 5.11E-15                 | 0.81705               | 0.00188  | 0.03969               | 0.00016  | 0.00104               | 0.00004  | 0.15921               | 0.00088  | 0.00239               | 0.00004  | 3.0742                                           | 0.3189 | 14.89               | 7.306    | 0.756    |
| 33764-02D | 5         | 2.54E-15                 | 0.40067               | 0.00160  | 0.07145               | 0.00032  | 0.00119               | 0.00004  | 0.28515               | 0.00119  | 0.00099               | 0.00005  | 1.8431                                           | 0.1966 | 32.77               | 4.384    | 0.467    |
| 33764-02E | 6         | 2.60E-15                 | 0.41371               | 0.00161  | 0.12675               | 0.00037  | 0.00179               | 0.00004  | 0.49874               | 0.00165  | 0.00077               | 0.00005  | 1.7686                                           | 0.1085 | 54.02               | 4.207    | 0.258    |
| 33764-02F | 7         | 2.53E-15                 | 0.40611               | 0.00153  | 0.12199               | 0.00037  | 0.00185               | 0.00005  | 0.49308               | 0.00165  | 0.00073               | 0.00004  | 1.8892                                           | 0.1008 | 56.59               | 4.493    | 0.239    |
| 33764-02G | 8         | 2.48E-15                 | 0.40223               | 0.00211  | 0.08937               | 0.00035  | 0.00124               | 0.00004  | 0.35979               | 0.00119  | 0.00090               | 0.00005  | 1.8264                                           | 0.1688 | 40.46               | 4.344    | 0.401    |
| 33764-02H | 10        | 4.88E-15                 | 0.77820               | 0.00181  | 0.17227               | 0.00045  | 0.00278               | 0.00006  | 0.72932               | 0.00281  | 0.00181               | 0.00003  | 1.7431                                           | 0.0668 | 38.47               | 4.146    | 0.159    |
| 33764-02I | 12        | 1.64E-15                 | 0.26549               | 0.00188  | 0.05624               | 0.00017  | 0.00084               | 0.00003  | 0.33402               | 0.00094  | 0.00067               | 0.00003  | 1.6451                                           | 0.1617 | 34.70               | 3.913    | 0.384    |
| 33764-02J | 14        | 4.03E-16                 | 0.06768               | 0.00134  | 0.01305               | 0.00012  | 0.00024               | 0.00003  | 0.09418               | 0.00064  | 0.00018               | 0.00003  | 1.6235                                           | 0.6291 | 31.14               | 3.862    | 1.495    |
| 33764-02K | 17        | 3.90E-16                 | 0.06181               | 0.00134  | 0.01130               | 0.00011  | 0.00019               | 0.00003  | 0.12036               | 0.00079  | 0.00020               | 0.00003  | 0.9773                                           | 0.7286 | 17.73               | 2.326    | 1.733    |
| 33764-02L | 20        | 2.33E-16                 | 0.03712               | 0.00129  | 0.00614               | 0.00014  | 0.00012               | 0.00003  | 0.08613               | 0.00060  | 0.00011               | 0.00003  | 1.7126                                           | 1.3423 | 28.02               | 4.074    | 3.189    |

Samples were degassed in two aliquots (Run ID numbers 33764-01 and 33764-02) by incremental heating with a CO<sub>2</sub> laser beam conducted through an integrator lens for homogeneous heating. Each aliquot was approximately 50 mg of sample.  $J = 0.001320 \pm 0.000002$  based on replicate analyses of the 1.194 Ma ACs standard (Nomade et al., 2005). Isotope relative abundances are given in units of amplified ion beam current (nA), corrected for background, mass discrimination, radioactive decay. Discrimination was  $1.0063 \pm 0.0023$  per atomic mass unit, applied as a power law correction. Ages are computed from these data, corrected for interfering nuclear reactions summarized by Renne et al. (2005), using the constants summarized by Steiger and Jäger (1977). Age uncertainties do not include contributions from decay constants or the age of the standard. All uncertainties in this table are given at one standard deviation.
