# Supplementary figures and images for: Asa Issie, Aramis and the origin of Australopithecus
Source: Springer Nature journal article supplement (doi:10.1038/nature04629), 2006-04-01

Supplementary Figure 1. ASI Paleosol Carbonates

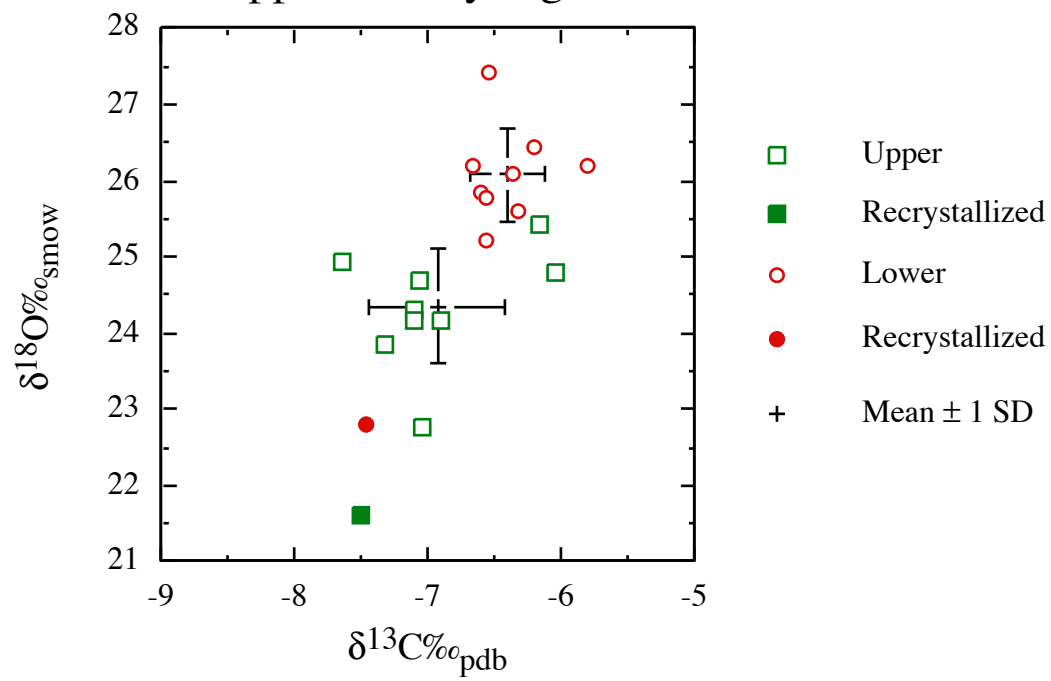

Supplement: 41586_2006_BFnature04629_MOESM4_ESM.pdf [file 41586_2006_BFnature04629_MOESM4_ESM.pdf]

### Run 33764-01, MA02-13

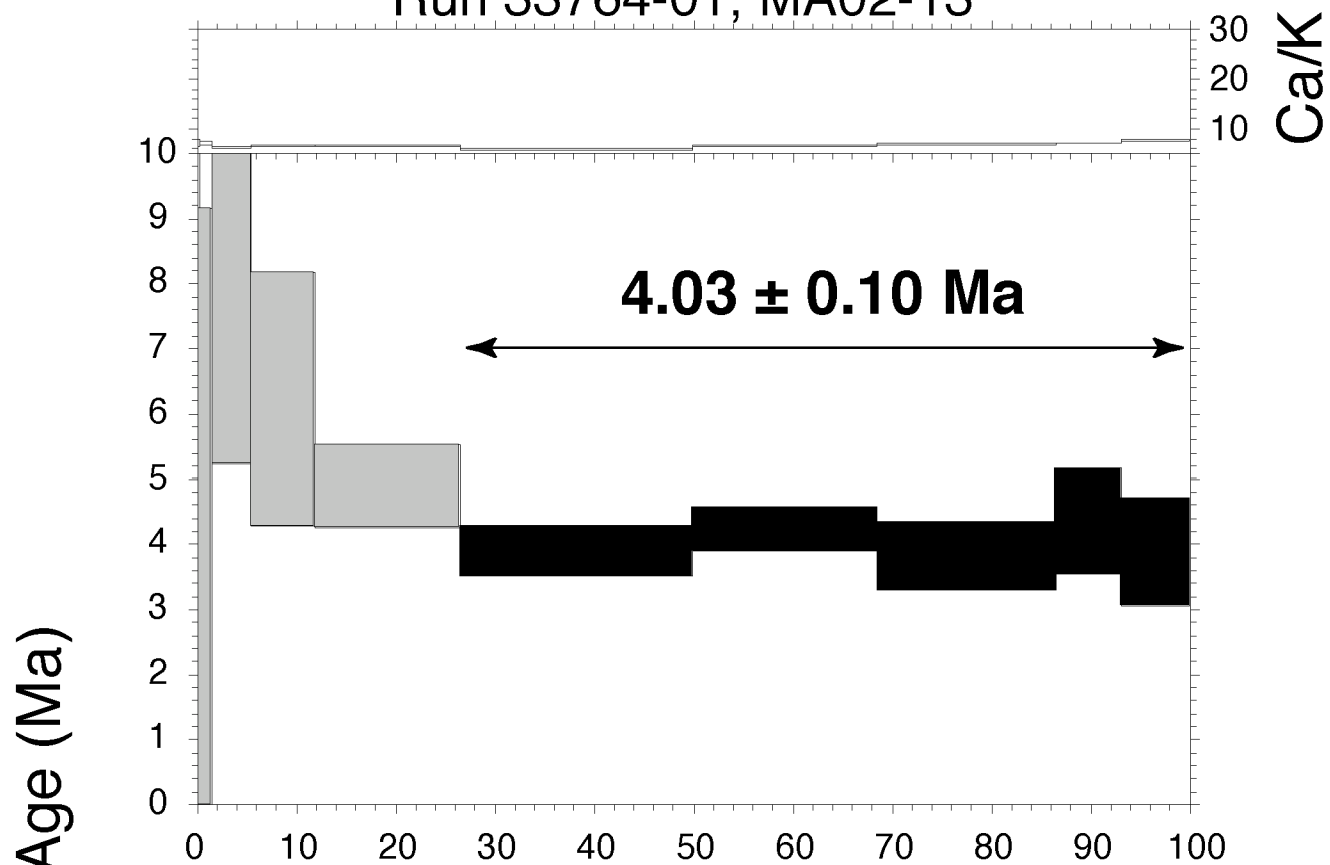

### Run 33764-02, MA02-13

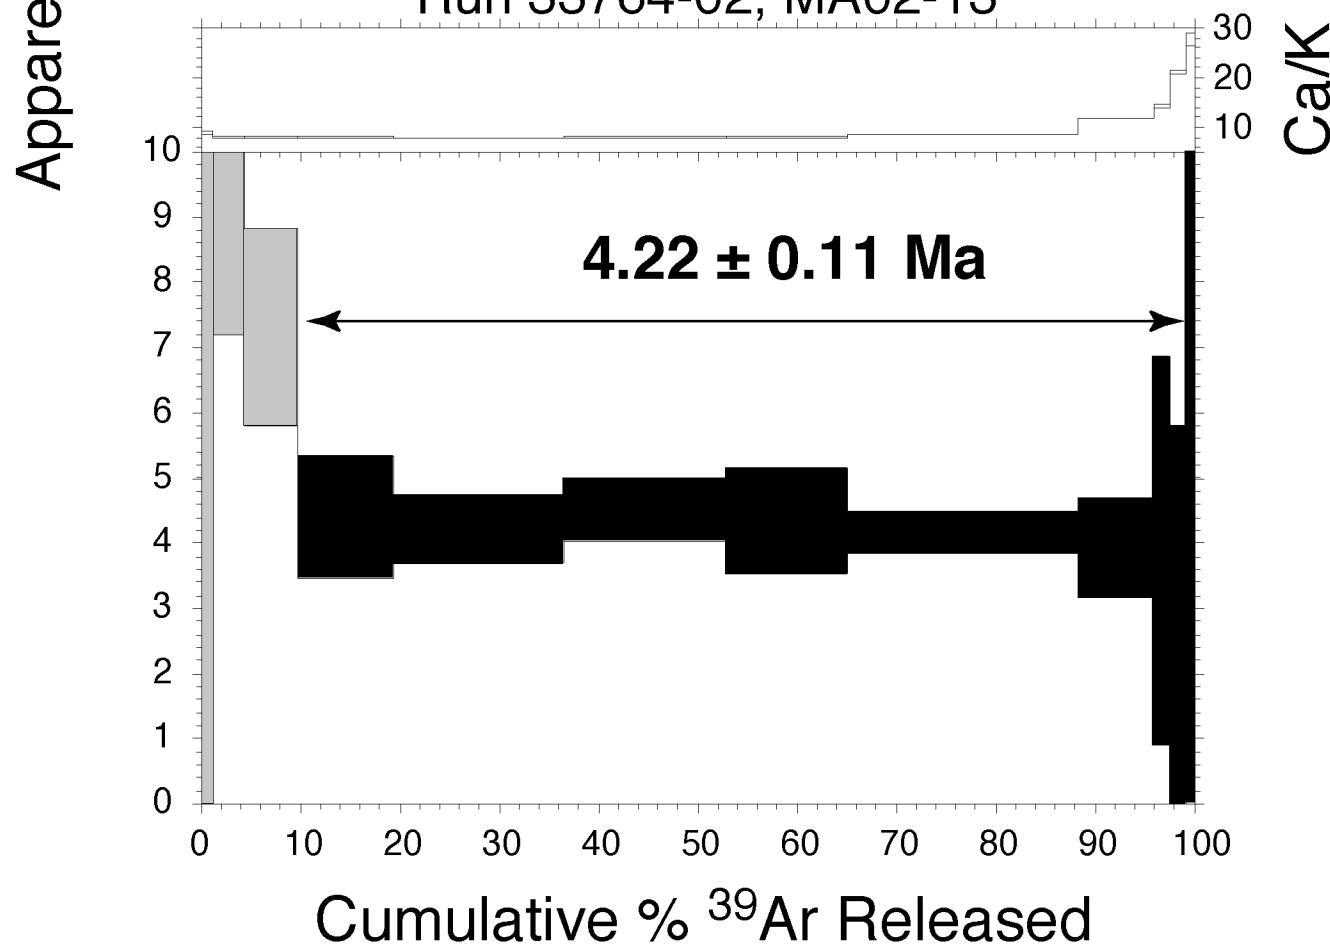

Supplementary Figure 3. Argon-Argon results.

Supplement: 41586_2006_BFnature04629_MOESM6_ESM.pdf [file 41586_2006_BFnature04629_MOESM6_ESM.pdf]
